# Supplementary material
Source: PubMed Central journal article supplement (PMC1449638)
Supplement: pnas_0511325103_2.pdf [file pnas_0511325103_2.pdf]

112711

11

11

11

11

11
