# Supplementary material
Source: PubMed Central journal article supplement (PMC1449638)

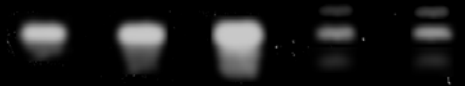

Supplement: pnas_0511325103_1.pdf [file pnas_0511325103_1.pdf]
